# Supplementary material for: Designing a customized clinical practice guideline regarding antibiotic prophylaxis for Iranian general dentists
Source: Springer Nature journal article supplement (doi:10.1186/s12903-019-0905-3), 2019-10-07
Supplement: MOESM1 [file 17248228]

**Our recommended flowchart for antibiotic prophylaxis for Iranian general dentists based on available dose of antibiotics in Iran- Part A:**

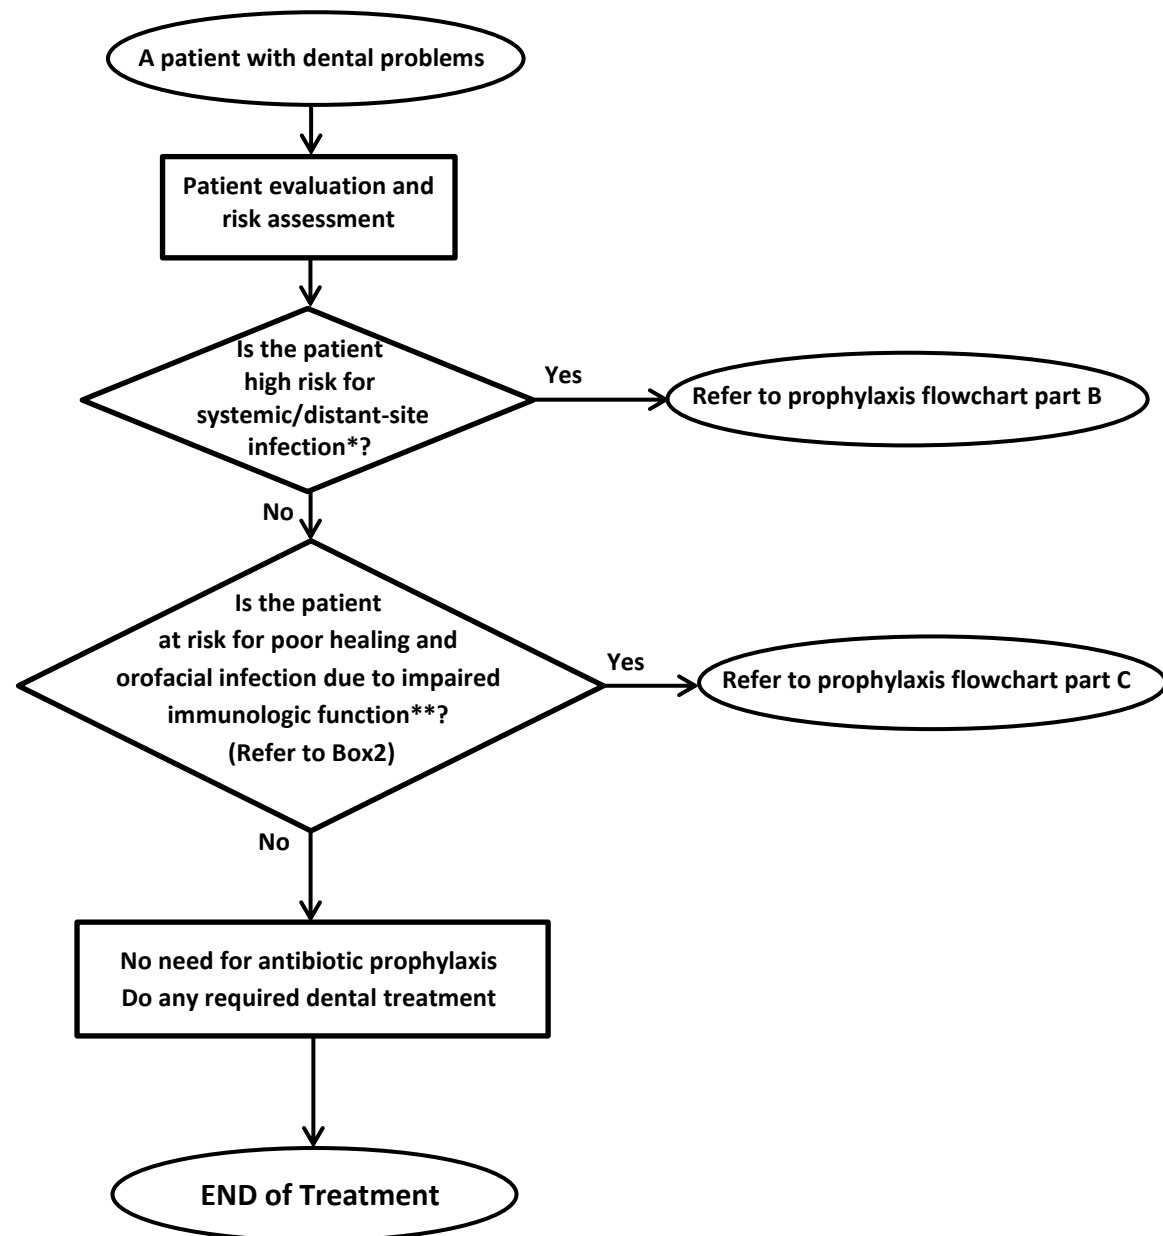

**\*Patients at risk for distant-site infection:**

**1- Patients with specific cardiac conditions associated with the highest risk of Infective Endocarditis:**

- Prosthetic cardiac valves, including trans-catheter implanted prostheses and homograft
- Prosthetic material used for cardiac valve repair, such as annuloplasty rings and chords
- Previous IE
- Unrepaired cyanotic congenital heart disease or repaired congenital heart disease, with residual shunts or valvular regurgitation at the site of or adjacent to the site of a prosthetic patch or prosthetic device.
- Cardiac transplant with valve regurgitation due to a structurally abnormal valve

**2-Patients with prosthetic joints at potential increased risk of Prosthetic joint infection:**

- Immunocompromised or immunosuppressed patients including:
  - ✓ inflammatory arthropathies such as rheumatoid arthritis, systemic lupus erythematosus
  - ✓ Disease-, drug- or radiation-induced immunosuppression
- Patients with comorbidities:
  - ✓ Previous prosthetic joint infection
  - ✓ Insulin-dependent (type 1) diabetes
  - ✓ First 2 years after joint replacement
  - ✓ Malnourishment
  - ✓ Hemophilia

Box 1

**\*\* Patients at risk for poor healing and orofacial infection due to impaired immunologic function:**

This category includes, but is not limited to, patients with the following medical conditions:

- HIV patients with CD4+ cell counts below 200/μL or severe neutropenia (neutrophil count < 500/μL)
- Diabetics with poor glycemic control:
  - ✓ Brittle diabetes (in which control is very difficult to achieve)
  - ✓ Who require a high dose of insulin (in type 1 diabetes) and have FBS > 207
- Patients undergoing irradiation of the Head and Neck (to prevent osteoradionecrosis)
- For immunocompromised patients, including:
  - ✓ Neutropenic cancer patients
  - ✓ Patients on chemotherapy
  - ✓ Hematopoietic stem cell or solid organ transplantation on immunosuppressive therapy
  - ✓ Patients with end-stage renal disease treated with hemodialysis

The Absolute neutrophil count (ANC) should be checked. If ANC is lower than 1000, the antibiotic prophylaxis should be recommended.  
 ANC= White Blood Cell (WBC) count X % of neutrophil

Box 2
