# Supplementary material for: Designing a customized clinical practice guideline regarding antibiotic prophylaxis for Iranian general dentists
Source: Springer Nature journal article supplement (doi:10.1186/s12903-019-0905-3), 2019-10-07
Supplement: MOESM3 [file 17248228]

**Our recommended flowchart for antibiotic prophylaxis for Iranian general dentists based on available dose of antibiotics in Iran**  
**Part C: patients at risk for poor healing and orofacial infection**  
**(Due to impaired immunologic function)**

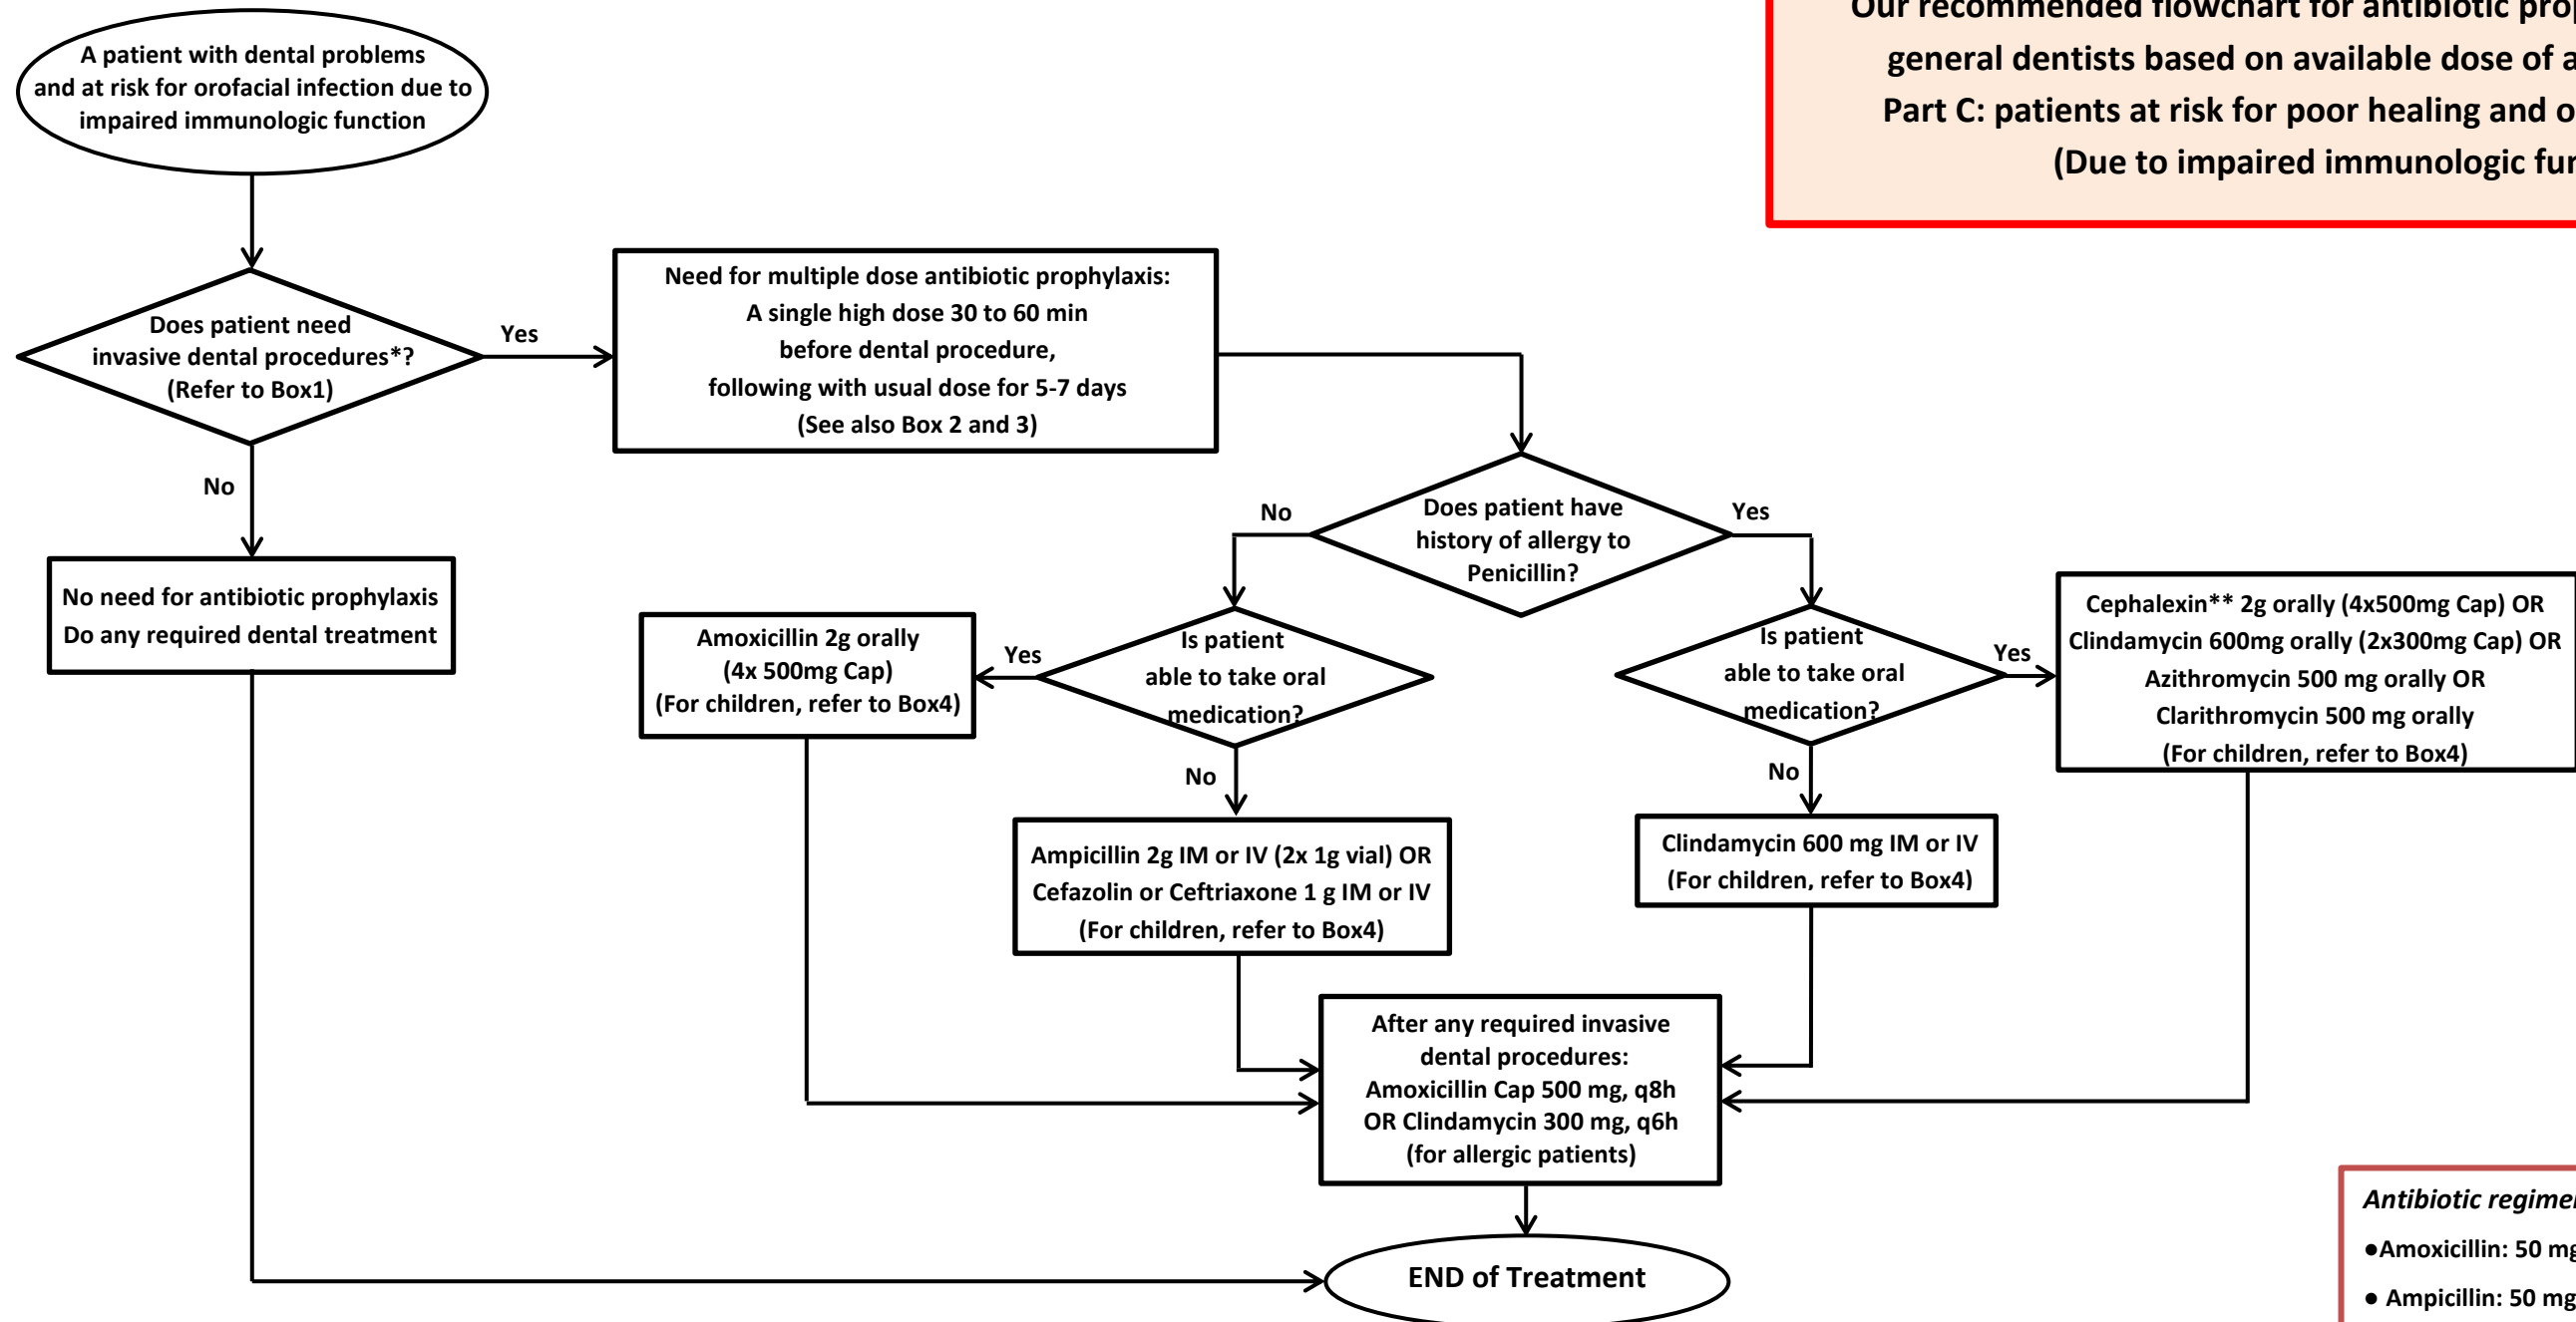

**\*Invasive dental procedures:**  
 All dental procedures that involve manipulation of the gingival tissue or the periapical region of teeth or perforation of the oral mucosa

That includes all dental procedures except the following procedures and events:

- Routine anesthetic injections through non-infected tissue
- Taking of dental radiographs
- Placement of removable prosthodontic or orthodontic appliances
- Adjustment of orthodontic appliances
- Shedding of deciduous teeth and bleeding from trauma to the lips or oral mucosa

Box 1

- If the antibiotic is inadvertently not administered before the procedure, the dosage may be administered up to 2 hours after the procedure.
- If dental procedure lasts over 6 hours; it may be prudent to administer an additional dose.
- Allow at least 10 days between appointments (preferably 10 to 14 days). If this is not possible, select an alternative antibiotic prophylaxis regimen for appointments within a 7-day period.

Box 2

- The practice of routine antibiotic prophylaxis prior to invasive dental procedures in patients with a compromised immune system is often based on medicolegal concerns rather than evidence.
- It is recommended to consider the individual patient's circumstances and consult with his/her physician before prescribing prophylactic antibiotic.

Box 3

**Antibiotic regimen for children:**

Box 4

- Amoxicillin: 50 mg/kg orally
- Ampicillin: 50 mg/kg IM or IV
- Azithromycin: 15 mg/kg orally
- Cefazolin or Ceftriaxone: 50 mg/kg IM or IV
- Cephalexin: 50 mg/kg orally
- Clindamycin: 20 mg/kg orally or IM or IV
- Clarithromycin: 15 mg/kg orally

\*\*Cephalosporins should not be used in an individual with a history of anaphylaxis, angioedema, or urticaria with penicillins or ampicillin.

Following with usual dose for one week:

- Amoxicillin: 250 mg Cap OR 250 mg/5ml Susp, q8h
- Clindamycin: 150 mg Cap, q6h
